# Supplementary material for: Residual tissue repositories as a resource for population-based cancer proteomic studies
Source: PubMed Central journal article supplement (PMC6074037; doi:10.1186/s12014-018-9202-4), 2018-08-03
Supplement: 12014_2018_9202_MOESM6_ESM.pdf [file 12014_2018_9202_MOESM6_ESM.pdf]

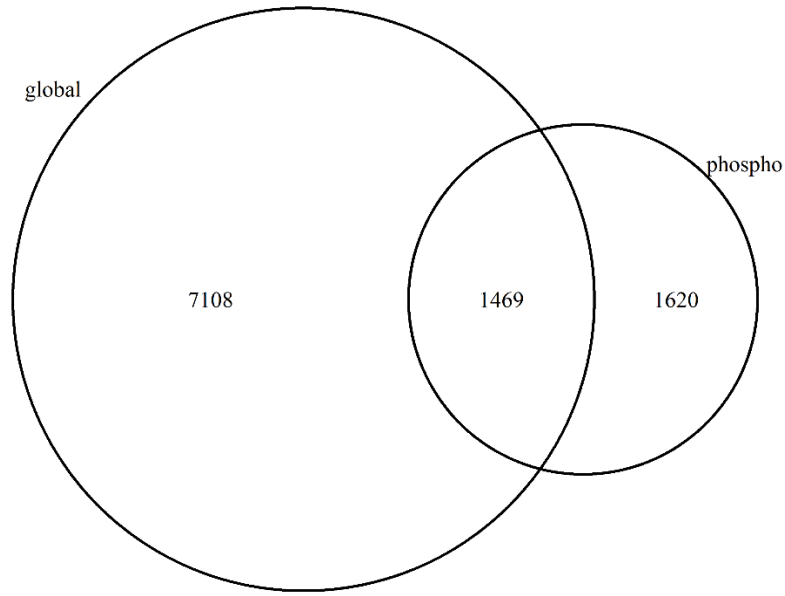

**Fig. S1.** Venn Diagram showing the overlap of protein counts at the gene level between the expression (global) proteomics and the phosphoproteomic analysis of SEER FFPE tissues.

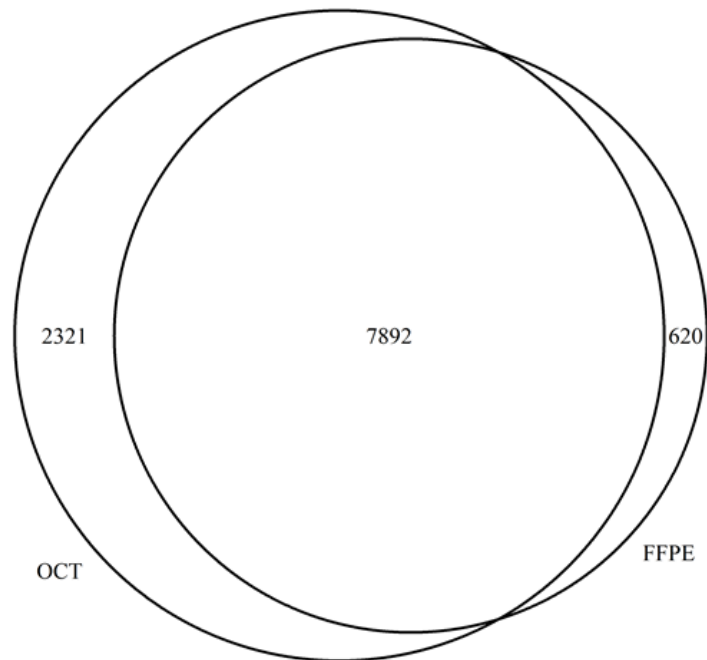

**Fig. S2.** Venn Diagram showing the overlap of protein counts at the gene level between the PNNL OCT and SEER FFPE tissue analyses.

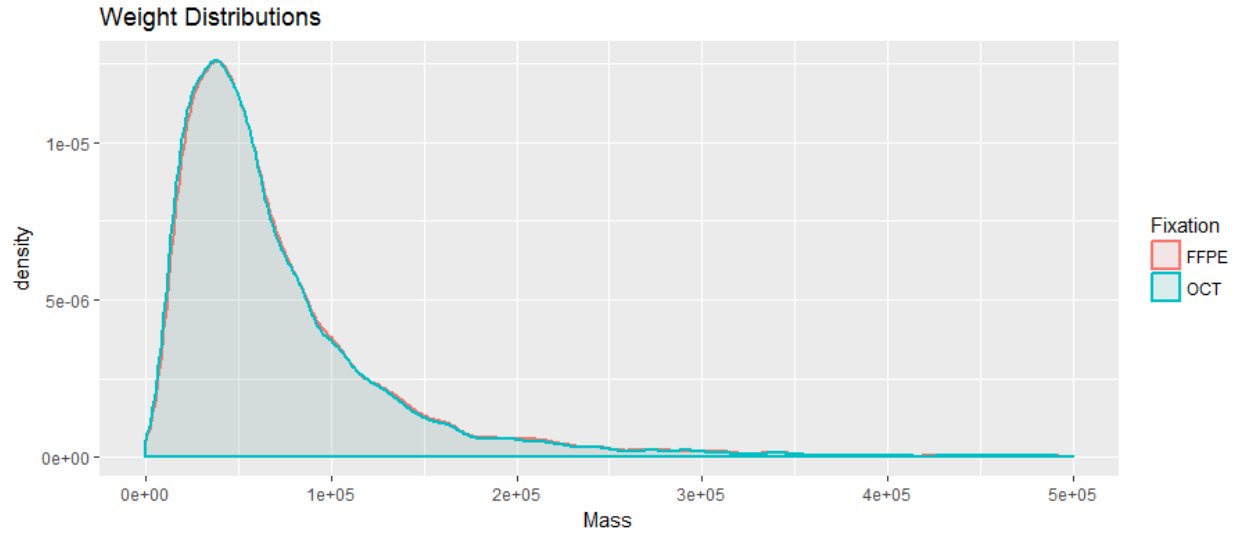

**Fig. S3.** Density plot overlay of protein MW for proteins identified in the PNNL OCT and SEER FFPE datasets.

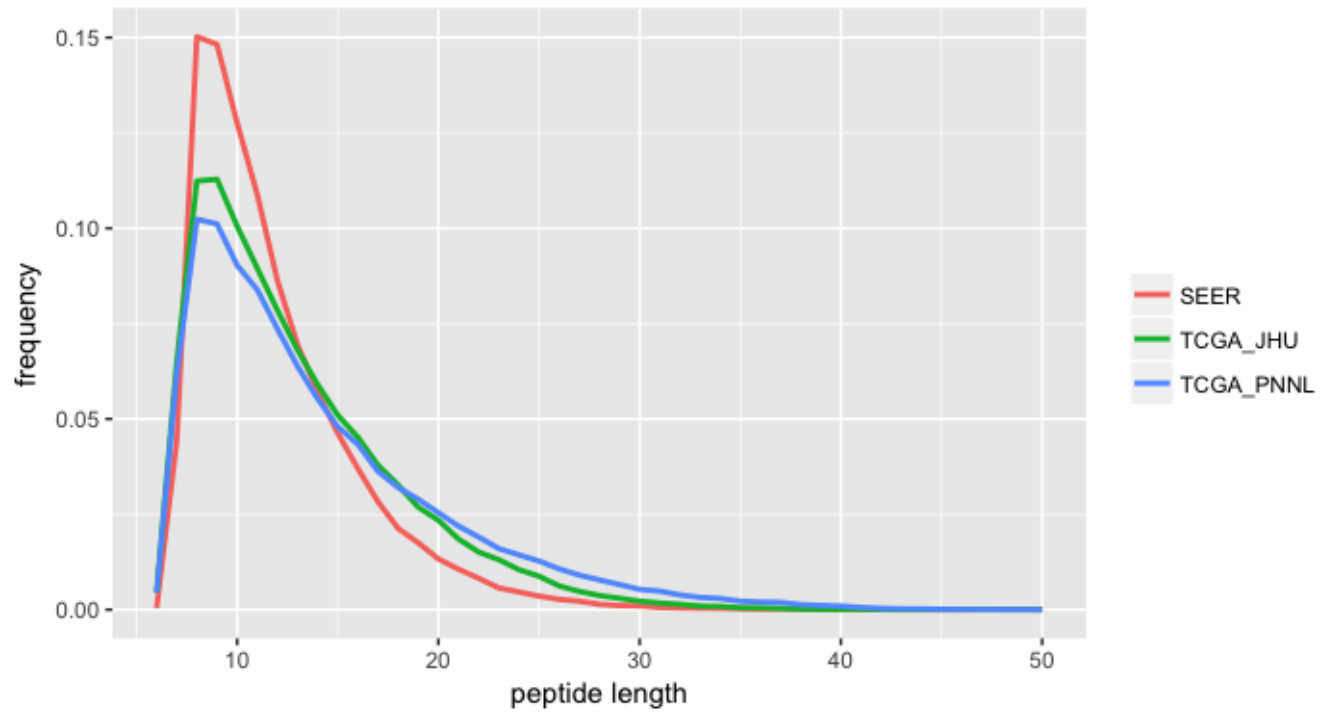

**Fig. S4.** Density plot overlay of peptide length in the PNNL and JHU OCT studies, and SEER FFPE datasets.

Unsupervised Clustering Analyses (Supplementary Figures 5A-D)

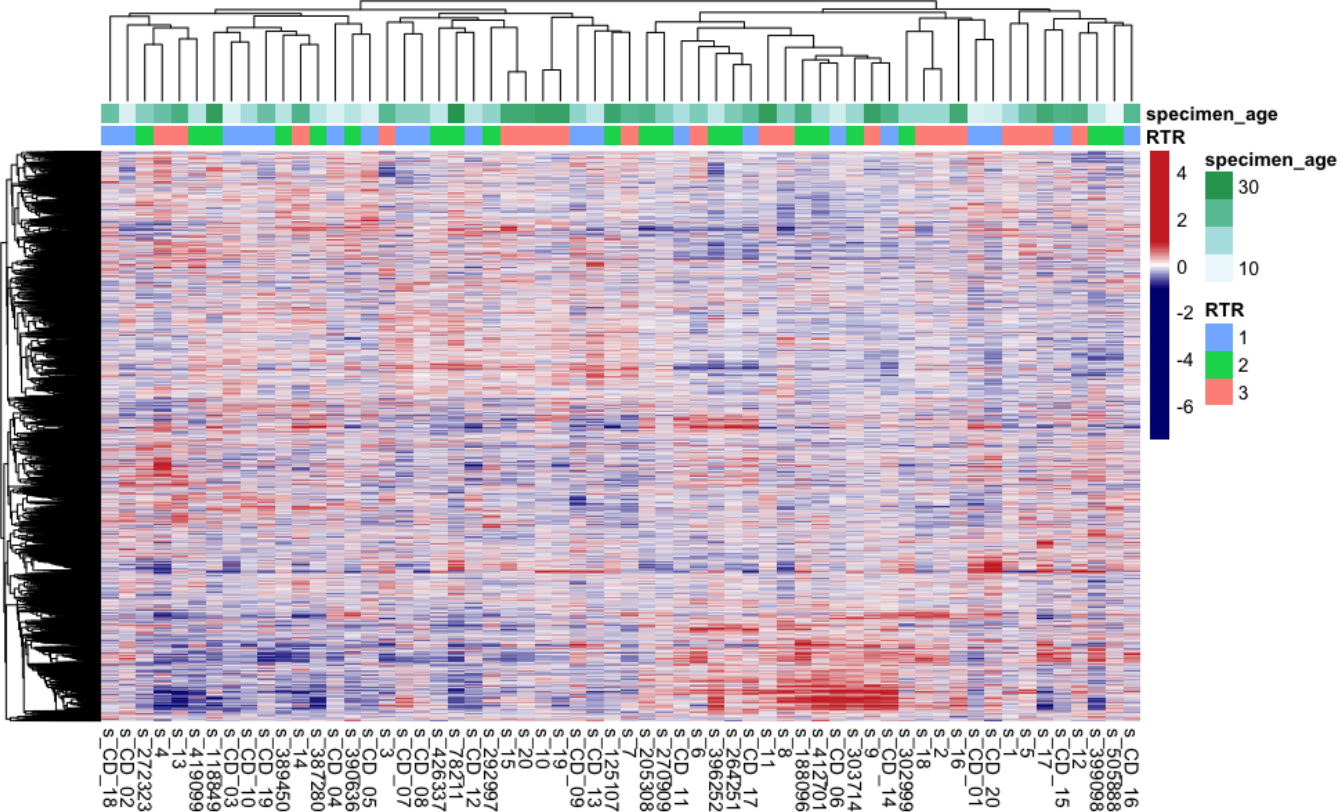

Fig. S5A. Unsupervised Clustering of Global Expression Proteomics (Full dataset).

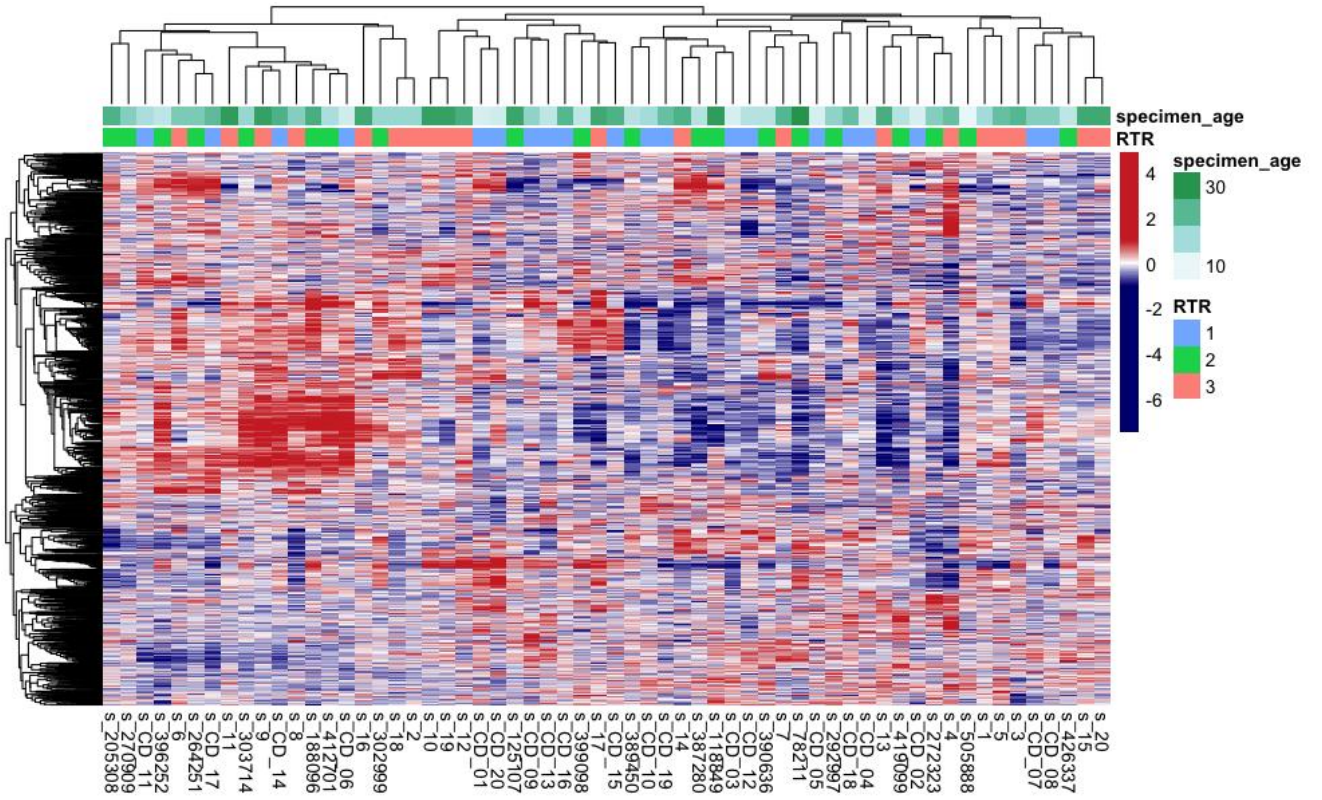

Fig. S5B. Unsupervised Clustering of Global Expression Proteomics (Most Variable 25%).

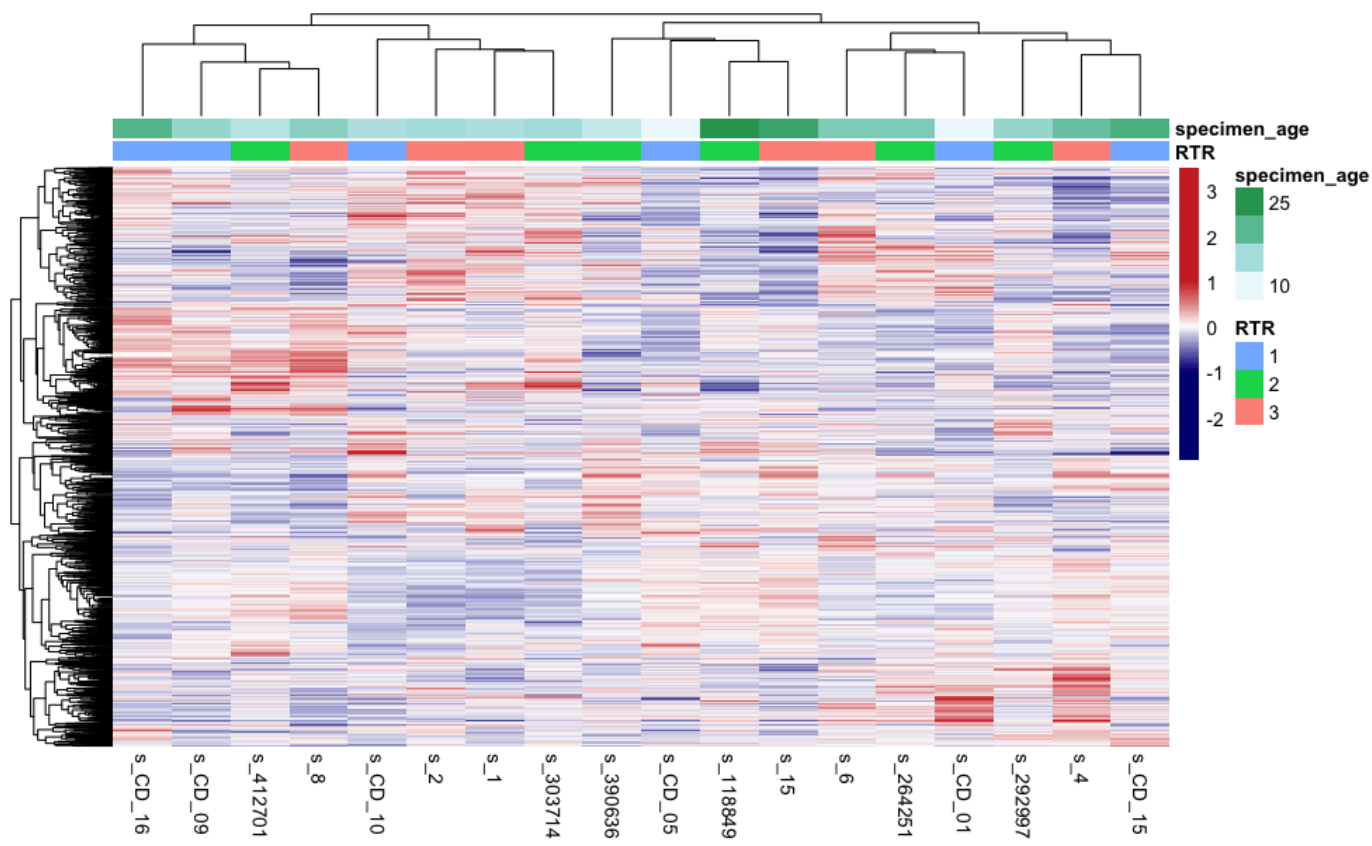

**Fig. S5C.** Unsupervised Clustering of Phosphoproteomics (Full Dataset).

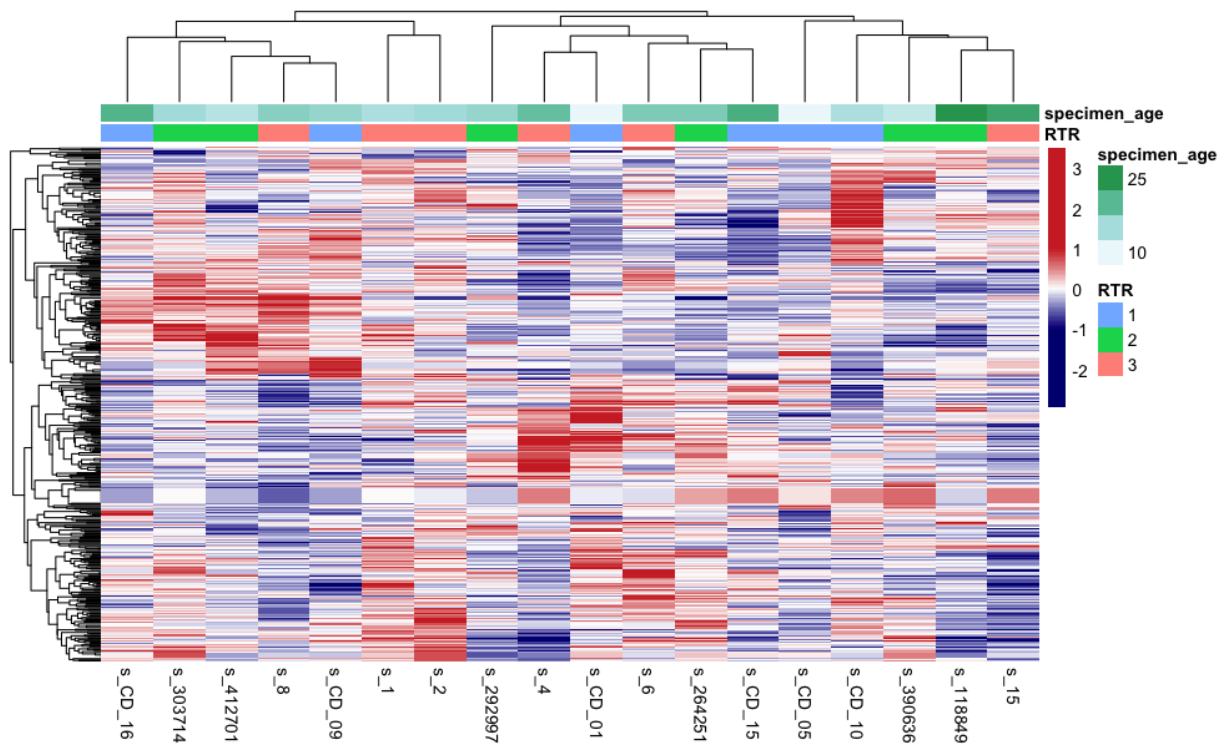

**Fig. S5D.** Unsupervised Clustering of Phosphoproteomics (Most Variable 25%).

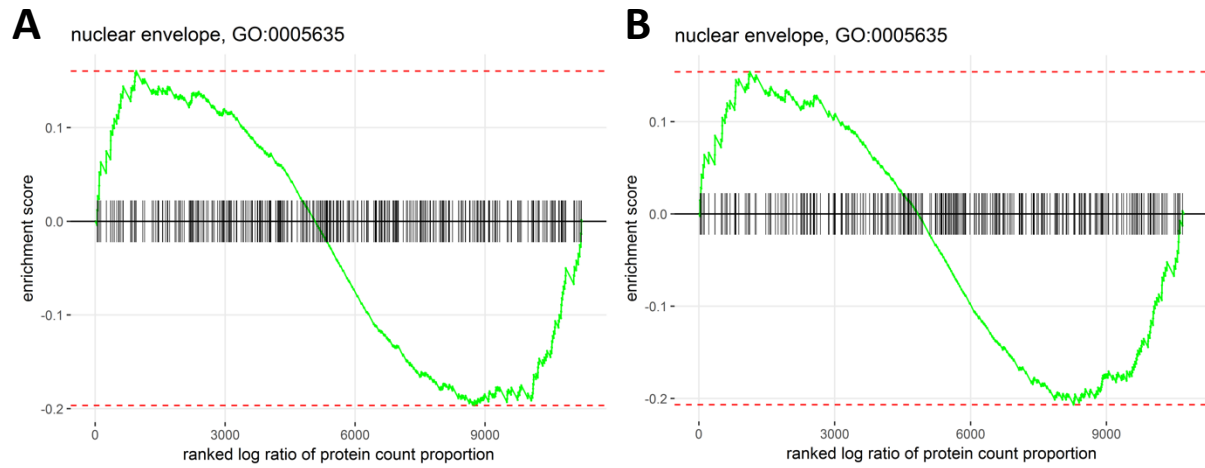

**Fig. S6.** GSEA test results for nuclear envelope GO:0005635 term. The broad terms contains 353 measured proteins that are part of nuclear membrane, pore, nucleoplasmic reticulum and other nuclear components that exclude DNA-binding proteins. **A** and **B** are comparison of SEER vs OCT1 and OCT2 datasets respectively. The p-values are 0.99 and 0.94 correspondingly.
